# Supplementary material
Source: PubMed Central journal article supplement (PMC3365770)
Supplement: supp_M111.331199_jbc.M111.331199-1.pdf [file supp_M111.331199_jbc.M111.331199-1.pdf]

## **SUPPLEMENTAL DATA**

Title: Subunit D of RNA polymerase from *Methanosarcina acetivorans* contains two oxygen-labile [4Fe-4S] clusters: implications for oxidant-dependent regulation of transcription

Authors: Faith H. Lessner, Matthew E. Jennings, Akira Hirata, Eduardus C. Duin, and Daniel J. Lessner

TABLE S1

FIGURE S1

**TABLE S1.** Archaeal RNAP subunit D classification based on the number of cysteine residues comprising partial or complete [4Fe-S] cluster binding motifs in domain3.

Group 1: complete motif #1 and #2

Group 2: complete motif #1

Group 3: complete motif #2

Group 4: partial motif #1 and/or motif #2

Group 5: lack domain 3 cysteine residues

Group 6: domain 3 amino acids are missing (lack of domain 3)

| Phylum or Order   | organism                             | <i>rpoD</i><br>gene ID | Cysteine residue content |          |                         |                         | [4Fe-4S]<br>clusters | Subunit D<br>Group |
|-------------------|--------------------------------------|------------------------|--------------------------|----------|-------------------------|-------------------------|----------------------|--------------------|
|                   |                                      |                        | Domain 2                 | Domain 1 | Domain 3:<br>Cluster #1 | Domain 3:<br>Cluster #2 |                      |                    |
| Desulfurococcales | Aeropyrum pernix K1                  | 1446211                | 2                        | 0        | 2                       | 2                       | none                 | 4                  |
|                   | Hyperthermus butylicus DSM 5456      | 4782414                | 2                        | 0        | 2                       | 2                       | none                 | 4                  |
|                   | Pyrolobus fumarii 1A                 | 11138404               | 2                        | 0        | 2                       | 2                       | none                 | 4                  |
|                   | Desulfurococcus mucosus DSM 2162     | 10154080               | 2                        | 0        | 4                       | 4                       | #1, #2               | 1                  |
|                   | Desulfurococcus kamchatkensis 1221n  | 7171405                | 2                        | 0        | 4                       | 4                       | #1, #2               | 1                  |
|                   | Ignisphaera aggregans DSM 17230      | 9715509                | 4                        | 0        | 4                       | 4                       | #1, #2               | 1                  |
|                   | Staphylothermus hellenicus DSM 12710 | 9234945                | 2                        | 0        | 4                       | 4                       | #1, #2               | 1                  |
|                   | Staphylothermus marinus F1           | 4907289                | 2                        | 0        | 4                       | 4                       | #1, #2               | 1                  |
|                   | Thermosphaera aggregans DSM 11486    | 9166443                | 2                        | 0        | 4                       | 4                       | #1, #2               | 1                  |
|                   | Ignicoccus hospitalis KIN4/I         | 5562263                | 2                        | 0        | 2                       | 4                       | #2                   | 3                  |
| Sulfolobales      | Acidianus hospitalis W1              | 10600112               | 4                        | 0        | 4                       | 2                       | #1                   | 2                  |
|                   | Metallosphaera cuprina Ar-4          | 10492339               | 4                        | 0        | 4                       | 2                       | #1                   | 2                  |
|                   | Metallosphaera sedula DSM 5348       | 5104884                | 4                        | 0        | 4                       | 2                       | #1                   | 2                  |
|                   | Sulfolobus acidocaldarius DSM 639    | 3473859                | 4                        | 0        | 4                       | 2                       | #1                   | 2                  |
|                   | Sulfolobus islandicus L.S.2.15       | 7798192                | 4                        | 0        | 4                       | 2                       | #1                   | 2                  |
|                   | Sulfolobus solfataricus              | 1455324                | 4                        | 0        | 4                       | 2                       | #1                   | 2                  |
|                   | Sulfolobus tokodaii str. 7           | 1460132                | 4                        | 0        | 4                       | 2                       | #1                   | 2                  |
| Thermoproteales   | Caldivirga maquilingensis IC-167     | 5709429                | 2                        | 0        | 3                       | 3                       | none                 | 4                  |
|                   | Pyrobaculum aerophilum str. IM2      | 1465165                | 2                        | 0        | 3                       | 3                       | none                 | 4                  |
|                   | Pyrobaculum arsenaticum DSM 13514    | 5054812                | 2                        | 0        | 3                       | 3                       | none                 | 4                  |
|                   | Pyrobaculum calidifontis JCM 11548   | 4910199                | 2                        | 0        | 3                       | 3                       | none                 | 4                  |
|                   | Pyrobaculum islandicum DSM 4184      | 4616570                | 2                        | 0        | 3                       | 3                       | none                 | 4                  |
|                   | Thermoproteus neutrophilus V24Sta    | 6164675                | 2                        | 0        | 3                       | 3                       | none                 | 4                  |
|                   | Thermoproteus uzoniensis 768-20      | 10361352               | 2                        | 0        | 3                       | 3                       | none                 | 4                  |

|                    |                                                     |          |   |   |   |   |             |   |
|--------------------|-----------------------------------------------------|----------|---|---|---|---|-------------|---|
|                    | Vulcanisaeta distributa DSM 14429                   | 9751000  | 2 | 0 | 3 | 3 | none        | 4 |
|                    | Vulcanisaeta moutnovskia 768-28                     | 10288618 | 2 | 0 | 3 | 3 | none        | 4 |
|                    | Thermofilum pendens Hrk 5                           | 4602090  | 0 | 0 | 0 | 4 | #1          | 2 |
| Archaeoglobales    | Archaeoglobus fulgidus DSM 4304                     | 1485514  | 4 | 1 | 4 | 4 | #1,#2       | 1 |
|                    | Archaeoglobus profundus DSM 5631                    | 8739703  | 4 | 1 | 4 | 4 | #1,#2       | 1 |
|                    | Archaeoglobus veneficus SNP6                        | 10393458 | 4 | 1 | 4 | 4 | #1,#2       | 1 |
|                    | Ferroglobus placidus DSM 10642                      | 8778351  | 4 | 1 | 4 | 4 | #1,#2       | 1 |
| Halobacteriales    | Haladaptatus paucihalophilus DX253                  |          | 0 | 0 | 0 | 0 | none        | 5 |
|                    | Halalkalicoccus jeotgali B3                         | 9419552  | 0 | 0 | 0 | 0 | none        | 5 |
|                    | Haloarcula hispanica ATCC 33960                     | 11049700 | 0 | 0 | 0 | 0 | none        | 5 |
|                    | Haloarcula marismortui ATCC 43049                   | 3129579  | 0 | 0 | 0 | 0 | none        | 5 |
|                    | Halobacterium salinarum R1                          | 5954259  | 0 | 0 | 0 | 0 | none        | 5 |
|                    | Haloferax volcanii DS2                              | 8926874  | 0 | 0 | 0 | 0 | none        | 5 |
|                    | Halogeometricum borinquense DSM 11551               | 9993073  | 0 | 0 | 0 | 0 | none        | 5 |
|                    | Halomicrobium mukohataei DSM 12286                  | 8412139  | 0 | 0 | 0 | 0 | none        | 5 |
|                    | Haloquadratum walsbyi DSM 16790                     | 4194635  | 0 | 0 | 0 | 0 | none        | 5 |
|                    | Halopiger xanaduensis SH-6                          | 10799252 | 0 | 0 | 0 | 0 | none        | 5 |
|                    | Halorhabdus utahensis DSM 12940                     | 8384824  | 0 | 0 | 0 | 0 | none        | 5 |
|                    | Halorubrum lacusprofundi ATCC 49239                 | 7399695  | 0 | 0 | 0 | 0 | none        | 5 |
|                    | Haloterrigena turkmenica DSM 5511                   | 8743163  | 0 | 0 | 0 | 0 | none        | 5 |
|                    | Natrialba magadii ATCC 43099                        | 8823246  | 0 | 0 | 0 | 0 | none        | 5 |
|                    | Natronomonas pharaonis DSM 2160                     | 3703154  | 0 | 0 | 0 | 0 | none        | 5 |
| Methanobacteriales | Methanobacterium sp. AL-21                          | 10277257 | 4 | 1 | 4 | 4 | #1,#2       | 1 |
|                    | Methanobrevibacter ruminantium M1                   | 8770560  | 3 | 1 | 4 | 0 | #1          | 2 |
|                    | Methanobrevibacter smithii ATCC 35061               | 5217217  | 0 | 1 | 4 | 1 | #1          | 2 |
|                    | Methanosphaera stadtmanae DSM 3091                  | 3854742  | 4 | 1 | 4 | 0 | #1          | 2 |
|                    | Methanothermobacter marburgensis str. Marburg       | 9704233  | 4 | 1 | 4 | 4 | #1,#2       | 1 |
|                    | Methanothermobacter thermautotrophicus str. Delta H | 1469999  | 4 | 1 | 4 | 4 | #1,#2       | 1 |
|                    | Methanothermus fervidus DSM 2088                    | 9962622  | 4 | 1 | 4 | 4 | #1,#2       | 1 |
| Methanococcales    | Methanocaldococcus fervens AG86                     | 8365160  | 1 | 0 | 0 | 0 | no domain 3 | 6 |
|                    | Methanocaldococcus infernus ME                      | 9131706  | 1 | 0 | 0 | 0 | no domain 3 | 6 |
|                    | Methanocaldococcus jannaschii DSM 2661              | 1451040  | 1 | 0 | 0 | 0 | no domain 3 | 6 |
|                    | Methanocaldococcus sp. FS406-22                     | 8803920  | 1 | 0 | 0 | 0 | no          | 6 |

|                    |                                      |          |   |   |   |   |                            |   |
|--------------------|--------------------------------------|----------|---|---|---|---|----------------------------|---|
|                    | Methanocaldococcus vulcanius M7      | 8513993  | 1 | 0 | 0 | 0 | domain 3<br>no<br>domain 3 | 6 |
|                    | Methanococcus aeolicus Nankai-3      | 5326605  | 1 | 0 | 0 | 0 | domain 3<br>no<br>domain 3 | 6 |
|                    | Methanococcus maripaludis S2         | 2762136  | 1 | 0 | 0 | 0 | domain 3<br>no<br>domain 3 | 6 |
|                    | Methanococcus vannielii SB           | 5324690  | 1 | 0 | 0 | 0 | domain 3<br>no<br>domain 3 | 6 |
|                    | Methanococcus voltae A3              | 9275437  | 1 | 0 | 0 | 0 | domain 3<br>no<br>domain 3 | 6 |
|                    | Methanothermococcus okinawensis IH1  | 10773159 | 1 | 0 | 0 | 0 | domain 3<br>no<br>domain 3 | 6 |
|                    | Methanotorris igneus Kol 5           | 10643705 | 1 | 0 | 0 | 0 | domain 3<br>no<br>domain 3 | 6 |
| Methanomicrobiales | Methanocorpusculum labreanum Z       | 4794628  | 4 | 1 | 4 | 4 | #1,#2                      | 1 |
|                    | Methanoculleus marisnigri JR1        | 4846177  | 4 | 1 | 4 | 4 | #1,#2                      | 1 |
|                    | Methanoplanus petrolearius DSM 11571 | 9743205  | 4 | 1 | 4 | 4 | #1,#2                      | 1 |
|                    | Methanoregula boonei 6A8             | 5410157  | 4 | 1 | 4 | 4 | #1,#2                      | 1 |
|                    | Methanosphaerula palustris E1-9c     | 7272107  | 4 | 1 | 4 | 4 | #1,#2                      | 1 |
|                    | Methanospirillum hungatei JF-1       | 3924460  | 4 | 1 | 4 | 4 | #1,#2                      | 1 |
| Methanopyrales     | Methanopyrus kandleri AV19           | 1478069  | 4 | 0 | 2 | 0 | none                       | 4 |
| Methanosarcinales  | Methanococcoides burtonii DSM 6242   | 3996903  | 4 | 1 | 4 | 4 | #1,#2                      | 1 |
|                    | Methanohalobium evestigatum Z-7303   | 9346454  | 4 | 1 | 4 | 4 | #1,#2                      | 1 |
|                    | Methanohalophilus mahii DSM 5219     | 8983411  | 4 | 1 | 4 | 4 | #1,#2                      | 1 |
|                    | Methanosaeta concilii GP-6           | 10460370 | 4 | 1 | 4 | 4 | #1,#2                      | 1 |
|                    | Methanosaeta thermophila PT          | 4462198  | 4 | 1 | 4 | 4 | #1,#2                      | 1 |
|                    | Methanosarcina acetivorans C2A       | 1473000  | 4 | 1 | 4 | 4 | #1,#2                      | 1 |
|                    | Methanosarcina barkeri str. Fusaro   | 3627569  | 4 | 1 | 4 | 4 | #1,#2                      | 1 |
|                    | Methanosarcina mazei Go1             | 1480500  | 4 | 1 | 4 | 4 | #1,#2                      | 1 |
| Thermococcales     | Pyrococcus abyssi GE5                | 1495432  | 0 | 0 | 0 | 0 | none                       | 5 |
|                    | Pyrococcus furiosus DSM 3638         | 1469524  | 0 | 0 | 0 | 0 | none                       | 5 |
|                    | Pyrococcus horikoshii OT3            | 1442487  | 0 | 0 | 0 | 0 | none                       | 5 |
|                    | Pyrococcus sp. NA2                   | 10553683 | 0 | 0 | 0 | 0 | none                       | 5 |
|                    | Pyrococcus yayanosii CH1             | 10836830 | 0 | 0 | 0 | 0 | none                       | 5 |
|                    | Thermococcus barophilus MP           | 10040449 | 0 | 0 | 0 | 0 | none                       | 5 |
|                    | Thermococcus gammatolerans EJ3       | 7987168  | 0 | 0 | 0 | 0 | none                       | 5 |
|                    | Thermococcus kodakarensis KOD1       | 3234626  | 0 | 0 | 0 | 0 | none                       | 5 |

|                   |                                         |             |   |   |   |   |      |   |
|-------------------|-----------------------------------------|-------------|---|---|---|---|------|---|
|                   | Thermococcus onnurineus NA1             | 7017753     | 0 | 0 | 0 | 0 | none | 5 |
|                   | Thermococcus sibiricus MM 739           | 8095316     | 0 | 0 | 0 | 0 | none | 5 |
|                   | Thermococcus sp. AM4                    | 7419843     | 0 | 0 | 0 | 0 | none | 5 |
| Thermoplasmatales | Ferroplasma acidarmanus fer1            | ZP_05571044 | 4 | 0 | 2 | 0 | none | 4 |
|                   | Picrophilus torridus DSM 9790           | 2844373     | 4 | 0 | 2 | 0 | none | 4 |
|                   | Thermoplasma acidophilum DSM 1728       | 1456551     | 4 | 0 | 2 | 0 | none | 4 |
|                   | Thermoplasma volcanium GSS1             | 1441081     | 4 | 0 | 2 | 0 | none | 4 |
| Nanoarchaeaota    | Nanoarchaeum equitans Kin4-M            | 2654414     | 0 | 0 | 0 | 0 | none | 5 |
| Korarchaeaota     | Candidatus Korarchaeum cryptofilum OPF8 | Kcr_1582    | 0 | 0 | 2 | 4 | #2   | 3 |

FIGURE S1

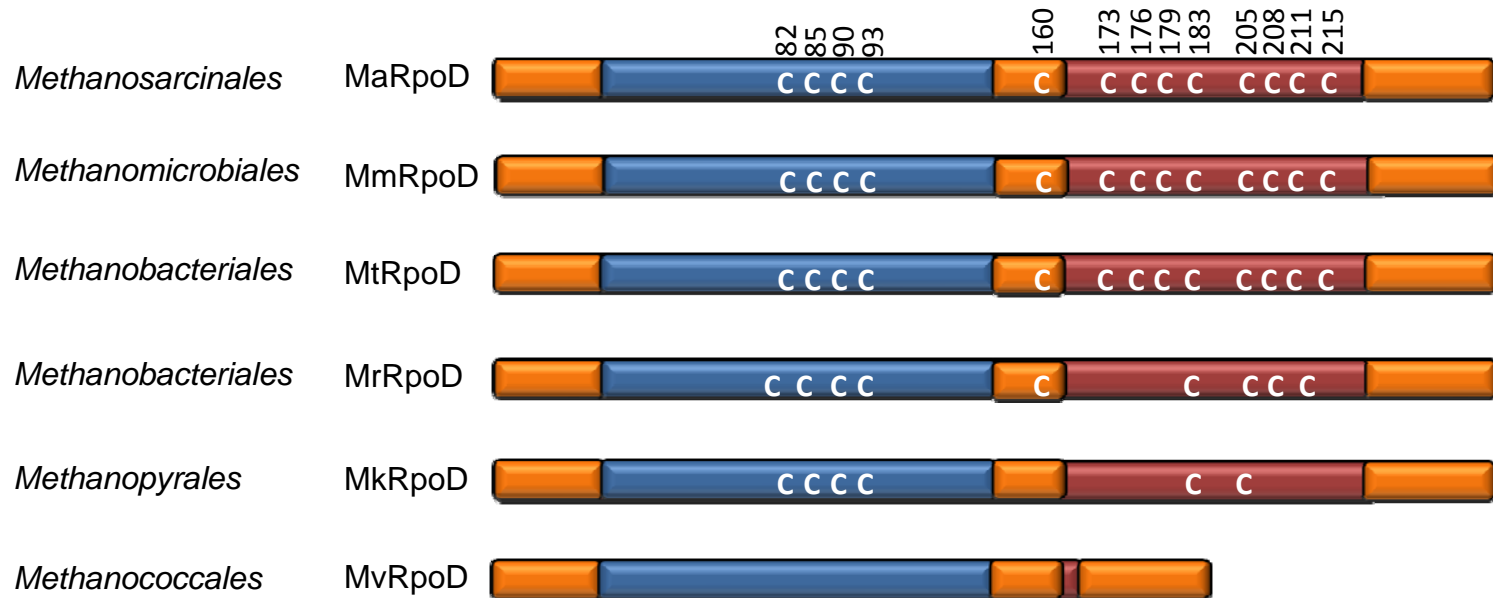

**Figure S1:** Comparison of the domain organization and cysteine residue content of subunit D of RNAP from representative species from the five orders of methanogens. Mt, *Methanothermobacter thermautotrophicus*; Mm, *Methanoculleus marisnigri*; Ms, *Methanosphaera stadtmanae*; Mk, *Methanopyrus kandleri*; Mv, *Methanococcus vannielii*; Mr, *Methanobrevibacter ruminantium*.
